# Supplementary material
Source: PubMed Central journal article supplement (PMC7839071)
Supplement: NIHMS1663855-supplement-1.pdf [file NIHMS1663855-supplement-1.pdf]

Supplementary Table 1. Comparison between urinary cotinine concentrations and self-reported tobacco use in the Golestan Cohort samples

| Self-reported group                   | Baseline cotinine concordant with self-report |                   |
|---------------------------------------|-----------------------------------------------|-------------------|
| Never tobacco and opiate user (n=60)  | 58 (96.7%)                                    |                   |
| Exclusive cigarette smoker (n=35)     | 33 (94.3%)                                    |                   |
| Exclusive opiate user (n=30)          | 23 (76.7%)                                    |                   |
| Dual opiate and cigarette user (n=30) | 30 (100%)                                     |                   |
| TOTAL                                 | 144 (92.9%)*                                  | * kappa=0.82±0.08 |
